# Supplementary material for: Scale-Dependent Transition in Soil Moisture Memory and Its Environmental Controls in Complex Mountain Terrain
Source: Copernicus journal article supplement (doi:10.5194/egusphere-2025-6014), 2026-01-06
Supplement: Supplementary file 1 [file S1 Soil Moisture and Its Drivers in the Dali River Basin.xlsx]

## Sheet: Sheet1
The first month of the rainy season	Day	SM	Prec.	T2m	AE	WS	rhu	NDVI	elevation_m	slope	aspect	twi	density (g/cm?)	sand_content_g/kg	silt_content_g/kg	clay_content_g/kg		Rainy season	Day	SM	Prec.	T2m	AE	WS	rhu	NDVI	elevation_m	slope	aspect	twi	density (g/cm?)	sand_content_g/kg	silt_content_g/kg	clay_content_g/kg		The first month of the dry season	Day	SM	Prec.	T2m	AE	WS	rhu	NDVI	elevation_m	slope	aspect	twi	density (g/cm?)
June	2022-06-01	0.174	0	24.582	0.0496	2.952	33.01											Jun-Sep, 2022	2022-06-01	0.174	0	24.582	0.0496	2.952	33.01											Oct, 2021	2021-10-01	0.12	1.73	18.04	0.110641	3.026	56.19
	2022-06-02	0.182	0	25.845	0.0375	4.017	36.69												2022-06-02	0.182	0	25.845	0.0375	4.017	36.69												2021-10-02	0.131	0.08	20.681	0.0983	4.374	66.13
	2022-06-03	0.167	6.07	23.282	0.056	4.512	66.01												2022-06-03	0.167	6.07	23.282	0.056	4.512	66.01												2021-10-03	0.141	17.55	17.579	0.0781	3.835	75.15
	2022-06-04	0.151	0	20.879	0.14619	3.234	44.28												2022-06-04	0.151	0	20.879	0.14619	3.234	44.28												2021-10-04	0.144	25.7	9.033	0.0683	3.333	95.08
	2022-06-05	0.149	0	22.115	0.132146	3.279	27.11												2022-06-05	0.149	0	22.115	0.132146	3.279	27.11												2021-10-05	0.139	31.5	8.514	0.0326	2.273	96.29
	2022-06-06	0.148	0	21.891	0.110791	2.797	25.87												2022-06-06	0.148	0	21.891	0.110791	2.797	25.87												2021-10-06	0.136	5.79	9.684	0.0291	1.429	92.58
	2022-06-07	0.154	0.01	24.035	0.0851	3.079	29.22												2022-06-07	0.154	0.01	24.035	0.0851	3.079	29.22												2021-10-07	0.131	0	11.623	0.0567	2.709	78.45
	2022-06-08	0.147	0.07	24.095	0.0725	2.68	33.44												2022-06-08	0.147	0.07	24.095	0.0725	2.68	33.44												2021-10-08	0.121	0.23	11.172	0.0518	2.686	87.07
	2022-06-09	0.129	0.18	22.149	0.0614	4.416	50.64												2022-06-09	0.129	0.18	22.149	0.0614	4.416	50.64												2021-10-09	0.12	6.17	8.461	0.0644	4.822	53.89
	2022-06-10	0.107	0	23.093	0.079	5.427	43.89												2022-06-10	0.107	0	23.093	0.079	5.427	43.89												2021-10-10	0.121	0.92	6.106	0.0663	1.874	60.48
	2022-06-11	0.101	5.21	22.484	0.071	3.583	68.36												2022-06-11	0.101	5.21	22.484	0.071	3.583	68.36												2021-10-11	0.121	0	8.381	0.0798	4.338	66.22
	2022-06-12	0.097	0	21.345	0.171992	2.829	35.71												2022-06-12	0.097	0	21.345	0.171992	2.829	35.71												2021-10-12	0.118	0	8.378	0.0461	3.688	85.67
	2022-06-13	0.105	0	20.289	0.151023	4.643	32.5												2022-06-13	0.105	0	20.289	0.151023	4.643	32.5												2021-10-13	0.113	0.03	11.455	0.0489	2.289	81.98
	2022-06-14	0.118	0	22.77	0.138686	3.263	26.15												2022-06-14	0.118	0	22.77	0.138686	3.263	26.15												2021-10-14	0.11	1	10.808	0.0526	2.95	59.97
	2022-06-15	0.123	0	25.523	0.115291	3.384	26.16												2022-06-15	0.123	0	25.523	0.115291	3.384	26.16												2021-10-15	0.114	0	10.117	0.0695	2.384	55.08
	2022-06-16	0.12	0	28.947	0.0946	4.113	27.47												2022-06-16	0.12	0	28.947	0.0946	4.113	27.47												2021-10-16	0.12	0	7.386	0.0748	2.348	56.94
	2022-06-17	0.116	0	27.933	0.0719	4.031	30.86												2022-06-17	0.116	0	27.933	0.0719	4.031	30.86												2021-10-17	0.121	0	8.392	0.0594	3.076	64.29
	2022-06-18	0.108	0	27.617	0.0756	4.352	30.44												2022-06-18	0.108	0	27.617	0.0756	4.352	30.44												2021-10-18	0.121	0	10.636	0.0638	2.326	62.31
	2022-06-19	0.097	0	26.908	0.0566	5.345	41.3												2022-06-19	0.097	0	26.908	0.0566	5.345	41.3												2021-10-19	0.12	2.48	8.091	0.0463	2.601	82.59
	2022-06-20	0.092	0	27.208	0.0531	5.747	39.29												2022-06-20	0.092	0	27.208	0.0531	5.747	39.29												2021-10-20	0.118	0	8.35	0.0763	3.542	58.94
	2022-06-21	0.098	5.95	26.166	0.0465	2.827	72.91												2022-06-21	0.098	5.95	26.166	0.0465	2.827	72.91												2021-10-21	0.112	0	6.598	0.0705	2.12	57.07
	2022-06-22	0.105	0.91	23.547	0.111992	2.986	79.57												2022-06-22	0.105	0.91	23.547	0.111992	2.986	79.57												2021-10-22	0.113	0	6.767	0.0608	2.885	53.12
	2022-06-23	0.11	0	26.715	0.152486	3.013	50.53												2022-06-23	0.11	0	26.715	0.152486	3.013	50.53												2021-10-23	0.116	0	9.4	0.0448	3.351	67.41
	2022-06-24	0.122	0	28.245	0.129295	2.477	37.94												2022-06-24	0.122	0	28.245	0.129295	2.477	37.94												2021-10-24	0.115	0	10.521	0.0546	1.775	69.94
	2022-06-25	0.128	0.57	29.206	0.0809	3.846	36.18												2022-06-25	0.128	0.57	29.206	0.0809	3.846	36.18												2021-10-25	0.112	0	11.124	0.058	2.215	59.14
	2022-06-26	0.13	7.52	22.833	0.041	3.212	80.39												2022-06-26	0.13	7.52	22.833	0.041	3.212	80.39												2021-10-26	0.106	0	10.1	0.0679	2.181	52.29
	2022-06-27	0.125	0.01	24.398	0.088	5.958	53.06												2022-06-27	0.125	0.01	24.398	0.088	5.958	53.06												2021-10-27	0.103	0	8.984	0.0494	1.489	64.21
	2022-06-28	0.134	0	22.173	0.0529	4.864	63.84												2022-06-28	0.134	0	22.173	0.0529	4.864	63.84												2021-10-28	0.104	0.02	9.84	0.0421	1.908	75.87
	2022-06-29	0.129	0.39	22.68	0.0668	2.649	63.84												2022-06-29	0.129	0.39	22.68	0.0668	2.649	63.84												2021-10-29	0.106	0	10.359	0.0614	2.513	57.2
	2022-06-30	0.129	0	24.66	0.075	2.24	47.88												2022-06-30	0.129	0	24.66	0.075	2.24	47.88												2021-10-30	0.108	0	8.073	0.044	1.939	56.03
																			2022-07-01	0.129	5.83	26.516	0.0764	3.212	56.84												2021-10-31	0.111	0	6.782	0.0468	1.936	56.49
																			2022-07-02	0.129	15.91	21.741	0.0802	3.583	86.77
																			2022-07-03	0.117	0	24.795	0.14003	3.1	70.44
																			2022-07-04	0.117	7.67	26.927	0.150926	2.972	66.6
																			2022-07-05	0.117	0.28	20.657	0.102956	2.649	73.2
																			2022-07-06	0.112	0	24.051	0.177082	2.528	51.19
																			2022-07-07	0.113	0	27.885	0.18988	4.986	42.39
																			2022-07-08	0.115	0.07	28.867	0.148713	2.531	45.09
																			2022-07-09	0.124	12.79	24.714	0.0829	3.675	71.92
																			2022-07-10	0.134	18.41	24.148	0.0757	3.06	78.2
																			2022-07-11	0.145	49.67	20.702	0.0692	2.712	94.67
																			2022-07-12	0.153	0.05	21.276	0.0917	1.66	86.49
																			2022-07-13	0.164	0.38	24.479	0.168413	1.721	77.4
																			2022-07-14	0.162	21.42	22.988	0.0874	2.405	88.29
																			2022-07-15	0.165	1.63	19.885	0.0497	2.369	94.39
																			2022-07-16	0.17	0	21.986	0.0734	3.655	68.19
																			2022-07-17	0.172	0	23.992	0.223082	2.736	55.66
																			2022-07-18	0.167	8.05	23.706	0.180732	2.037	57.57
																			2022-07-19	0.167	5.15	19.903	0.0981	1.882	83.62
																			2022-07-20	0.163	0	21.186	0.160239	1.835	65.36
																			2022-07-21	0.161	11.36	24.109	0.182181	3.543	65.46
																			2022-07-22	0.159	10.82	18.9	0.133948	2.429	78.75
																			2022-07-23	0.164	0	22.5	0.201617	3.486	63.13
																			2022-07-24	0.169	0.53	24.865	0.195555	4.292	61.51
																			2022-07-25	0.169	0	24.241	0.155547	3.73	73.19
																			2022-07-26	0.17	15.02	23.051	0.139592	2.802	82.28
																			2022-07-27	0.177	6.97	20.414	0.0968	2.11	79.59
																			2022-07-28	0.174	0	23.206	0.198473	3.241	72.4
																			2022-07-29	0.17	0	24.613	0.199739	4.786	63.61
																			2022-07-30	0.183	0.24	23.511	0.1425	5.155	67.59
																			2022-07-31	0.189	0	24.415	0.134426	4.251	72.72
																			2022-08-01	0.188	0	25.393	0.157863	4.814	70.42
																			2022-08-02	0.189	0	25.73	0.135146	4.167	70.55
																			2022-08-03	0.187	0	26.093	0.13014	3.716	69.15
																			2022-08-04	0.171	13.92	26.09	0.105392	3.044	79.55
																			2022-08-05	0.154	0	26.481	0.142251	2.453	81.71
																			2022-08-06	0.145	0	28.317	0.155934	3.717	72.22
																			2022-08-07	0.138	6.59	27.811	0.118784	2.133	81.35
																			2022-08-08	0.131	24.37	25.258	0.13424	2.871	86.79
																			2022-08-09	0.123	7.59	23.059	0.088	2.213	93.43
																			2022-08-10	0.117	19.17	23.301	0.0857	2.267	93.72
																			2022-08-11	0.114	0.04	24.155	0.128561	2.377	88.5
																			2022-08-12	0.116	0	27.121	0.182855	2.945	77.37
																			2022-08-13	0.117	16.1	27.952	0.189771	4.335	74.65
																			2022-08-14	0.119	0.86	26.043	0.155685	4.053	72.56
																			2022-08-15	0.122	1.66	23.227	0.133005	2.021	78.44
																			2022-08-16	0.122	0	22.448	0.150906	3.984	78.7
																			2022-08-17	0.121	0.02	23.122	0.132338	4.874	79.37
																			2022-08-18	0.122	25.59	23.159	0.0722	3.094	90.86
																			2022-08-19	0.128	0.21	21.948	0.109239	1.612	75.38
																			2022-08-20	0.128	0	23.154	0.124857	4.943	77.56
																			2022-08-21	0.128	20.23	24.113	0.134514	3.48	83.63
																			2022-08-22	0.131	0	22.443	0.191704	3.338	64.53
																			2022-08-23	0.133	2.01	20.854	0.15581	4.011	73.99
																			2022-08-24	0.135	4.27	17.599	0.0928	2.065	95.52
																			2022-08-25	0.131	0	19.98	0.179609	2.014	65.02
																			2022-08-26	0.126	0	19.841	0.169791	2.279	65.77
																			2022-08-27	0.122	9.89	14.711	0.0689	4.279	91.61
																			2022-08-28	0.119	7.83	13.353	0.0435	2.128	95.59
																			2022-08-29	0.111	0	17.386	0.113262	1.988	84.1
																			2022-08-30	0.112	0	19.109	0.16475	2.269	68.87
																			2022-08-31	0.115	0	18.794	0.139803	2.06	66.21
																			2022-09-01	0.115	0	19.355	0.158572	2.659	69.21
																			2022-09-02	0.132	3.08	18.789	0.0876	2.909	83.48
																			2022-09-03	0.15	3.97	17.658	0.0925	2.712	82.59
																			2022-09-04	0.176	0	20.641	0.179837	3.103	66.08
																			2022-09-05	0.182	0	19.488	0.157683	2.864	62.36
																			2022-09-06	0.198	0	19.021	0.159978	1.994	54.94
																			2022-09-07	0.191	0	19.257	0.15251	2.483	59.45
																			2022-09-08	0.162	1.58	19.412	0.102323	2.356	74.62
																			2022-09-09	0.152	2.41	18.124	0.0982	2.029	78.05
																			2022-09-10	0.142	0	16.213	0.093	1.885	85.62
																			2022-09-11	0.133	0	17.47	0.108062	1.891	78.27
																			2022-09-12	0.127	0	18.894	0.127024	2.135	69.15
																			2022-09-13	0.124	0	20.058	0.121784	3.164	64.06
																			2022-09-14	0.128	0	18.38	0.102897	3.08	73.22
																			2022-09-15	0.135	0	18.634	0.11363	2.439	70.22
																			2022-09-16	0.128	0.02	19.55	0.0826	1.81	71.68
																			2022-09-17	0.119	0	20.978	0.0922	1.565	74.47
																			2022-09-18	0.107	0.09	21.551	0.0979	2.021	68.06
																			2022-09-19	0.1	0.18	15.743	0.0503	3.747	84.37
																			2022-09-20	0.094	0	14.159	0.101566	2.312	65.91
																			2022-09-21	0.095	0.09	15.986	0.0989	3.458	69.93
																			2022-09-22	0.094	0	15.395	0.10278	4.79	41.04
																			2022-09-23	0.094	0	11.016	0.0787	1.698	49.81
																			2022-09-24	0.092	0	14.085	0.0822	2.802	59.89
																			2022-09-25	0.089	0	17.34	0.083	2.317	59.63
																			2022-09-26	0.089	0	18.451	0.0769	2.58	57.85
																			2022-09-27	0.087	0	19.01	0.0667	2.926	61.33
																			2022-09-28	0.09	0.06	19.683	0.0762	2.386	58.89
																			2022-09-29	0.107	0	19.995	0.0673	3.894	50.47
																			2022-09-30	0.116	0	20.673	0.0609	3.683	54.16
[truncated: 105 more columns]
