# Supplementary material for: Scale-Dependent Transition in Soil Moisture Memory and Its Environmental Controls in Complex Mountain Terrain
Source: Copernicus journal article supplement (doi:10.5194/egusphere-2025-6014), 2026-01-06
Supplement: Supplementary file 2 [file S2 Soil Moisture and Its Drivers in the Anning River Basin.xlsx]

## Sheet: Sheet1
the first month of the rainy season	Day	SM	Prec.	T2m	AE	WS	rhu	NDVI	elevation_m	slope	aspect	twi	density (g/cm?)	sand_content_g/kg	silt_content_g/kg	clay_content_g/kg		Rainy season	Day	SM	Prec.	T2m	AE	WS	rhu	NDVI	elevation_m	slope	aspect	twi	density (g/cm?)	sand_content_g/kg	silt_content_g/kg	clay_content_g/kg		The first month of the dry season	Day	SM	Prec.	T2m	AE	WS	rhu	NDVI	elevation_m	slope	aspect	twi	density (g/cm?)
2022-05-01	1	0.214	0.947	5.289	0.089511	2.475	2.475											May to Sep, 2022	121	0.214	0.947	5.289	0.089511	2.475	73.91											Oct, 2021	274	0.202	0	19.803	0.11486	1.947	68.94
	2	0.198	0.5	10.519	0.0881458	2.19	2.19												122	0.198	0.5	10.519	0.0881458	2.19	57.85												275	0.207	0	20.123	0.0898719	2.353	65.2
	3	0.201	0.243	10.553	0.0854236	2.07	2.07												123	0.201	0.243	10.553	0.0854236	2.07	58.95												276	0.218	0.13	19.869	0.0671823	2.811	63.97
	4	0.186	0.5	13.911	0.0707536	1.919	1.919												124	0.186	0.5	13.911	0.0707536	1.919	51.6												277	0.215	0.607	19.633	0.0691831	2.647	65.13
	5	0.181	3.21	16.848	0.0663939	2.263	2.263												125	0.181	3.21	16.848	0.0663939	2.263	57.65												278	0.203	0	18.943	0.0236363	2.637	64.73
	6	0.19	1.287	16.853	0.0471876	2.117	2.117												126	0.19	1.287	16.853	0.0471876	2.117	61.57												279	0.199	15.63	18.765	0.0278262	2.297	72.43
	7	0.206	5.3	18.066	0.0294777	2.159	2.159												127	0.206	5.3	18.066	0.0294777	2.159	52.82												280	0.214	25.82	17.09	0.0596337	2.045	80.61
	8	0.236	13.543	19.341	0.0403851	2.609	2.609												128	0.236	13.543	19.341	0.0403851	2.609	65.1												281	0.236	8.03	17.456	0.0302323	1.908	80.68
	9	0.259	12.893	17.776	0.0573606	2.619	2.619												129	0.259	12.893	17.776	0.0573606	2.619	69.11												282	0.241	0.637	17.19	0.0667774	1.887	82.65
	10	0.288	1.847	18.826	0.0883923	2.568	2.568												130	0.288	1.847	18.826	0.0883923	2.568	59.76												283	0.255	0	16.443	0.0614801	2.163	72.12
	11	0.308	15.28	17.47	0.104591	2.748	2.748												131	0.308	15.28	17.47	0.104591	2.748	70.57												284	0.267	0	15.999	0.0691559	1.934	76.13
	12	0.327	7.677	17.048	0.0590104	1.908	1.908												132	0.327	7.677	17.048	0.0590104	1.908	68.84												285	0.26	0	17.69	0.0413251	2.16	74.17
	13	0.324	0.34	18.298	0.105641	2.324	2.324												133	0.324	0.34	18.298	0.105641	2.324	62.27												286	0.251	0.013	17.525	0.0478404	2.091	71.73
	14	0.328	10.707	14.731	0.115272	2.948	2.948												134	0.328	10.707	14.731	0.115272	2.948	75.79												287	0.256	0.927	14.587	0.0493761	1.663	80.62
	15	0.313	0.74	10.318	0.116513	2.048	2.048												135	0.313	0.74	10.318	0.116513	2.048	83.89												288	0.25	0.853	14.635	0.0614991	2.117	83.47
	16	0.296	5.853	13.348	0.129958	1.932	1.932												136	0.296	5.853	13.348	0.129958	1.932	71												289	0.252	2.107	10.786	0.0700897	2.155	83.45
	17	0.29	0.02	12.248	0.128229	1.836	1.836												137	0.29	0.02	12.248	0.128229	1.836	84.22												290	0.269	0	11.218	0.0461132	2.162	79.44
	18	0.28	0.19	16.074	0.0836692	2.17	2.17												138	0.28	0.19	16.074	0.0836692	2.17	72.83												291	0.276	0	14.233	0.0636422	2.067	79.02
	19	0.272	3.713	14.448	0.100481	2.471	2.471												139	0.272	3.713	14.448	0.100481	2.471	69.77												292	0.275	0	17.142	0.0419989	3.445	68.57
	20	0.271	6.233	15.239	0.101371	2.102	2.102												140	0.271	6.233	15.239	0.101371	2.102	73.39												293	0.286	1.717	13.923	0.0631877	2.971	73.78
	21	0.268	3.977	14.186	0.0928179	1.939	1.939												141	0.268	3.977	14.186	0.0928179	1.939	78.49												294	0.292	8.093	8.119	0.0677262	2.007	89.72
	22	0.261	1.79	14.013	0.0912608	1.738	1.738												142	0.261	1.79	14.013	0.0912608	1.738	78.78												295	0.281	0.03	8.687	0.0580522	1.527	80.58
	23	0.252	1.19	17.63	0.09771	1.894	1.894												143	0.252	1.19	17.63	0.09771	1.894	71.2												296	0.268	0	12.185	0.0351751	1.824	78.62
	24	0.241	9.82	19.147	0.107036	2.059	2.059												144	0.241	9.82	19.147	0.107036	2.059	71.34												297	0.272	0	12.675	0.0503118	1.965	73.61
	25	0.239	61.413	20.11	0.0774063	2.889	2.889												145	0.239	61.413	20.11	0.0774063	2.889	65.95												298	0.267	0	14.331	0.0583053	2.412	70.1
	26	0.237	20.923	17.245	0.0929432	1.887	1.887												146	0.237	20.923	17.245	0.0929432	1.887	83.22												299	0.256	0	10.401	0.06493	2.249	68.87
	27	0.221	2.343	17.339	0.0950358	2.015	2.015												147	0.221	2.343	17.339	0.0950358	2.015	77.39												300	0.242	0	11.289	0.0400451	2.068	71.16
	28	0.212	3.067	18.357	0.0931929	2.096	2.096												148	0.212	3.067	18.357	0.0931929	2.096	69.94												301	0.238	0	11.67	0.0455317	2.136	70.02
	29	0.206	24.667	20.09	0.0747612	2.995	2.995												149	0.206	24.667	20.09	0.0747612	2.995	66.86												302	0.222	0	12.421	0.0613277	2.101	68.11
	30	0.196	3.08	16.747	0.0997503	1.936	1.936												150	0.196	3.08	16.747	0.0997503	1.936	73.67												303	0.209	0	13.155	0.0416236	2.263	68.71
	31	0.189	17.047	19.702	0.104994	1.974	1.974												151	0.189	17.047	19.702	0.104994	1.974	73.73												304	0.206	0.02	10.354	0.0497471	2.224	69.39
																			152	0.207	29.157	19.806	0.0963114	1.982	74.6
																			153	0.229	47.253	20.33	0.08191	2.343	75.16
																			154	0.253	5.847	19.727	0.090124	1.754	73.74
																			155	0.282	19.873	19.613	0.146669	2.227	77.86
																			156	0.301	4.507	16.845	0.144713	2.597	78.34
																			157	0.312	0.03	16.997	0.1294	1.681	70.39
																			158	0.31	1.453	16.825	0.0970572	1.705	71.05
																			159	0.313	10.507	17.433	0.107894	1.638	84.26
																			160	0.303	7.54	16.46	0.0903689	1.697	86.49
																			161	0.305	5.223	16.79	0.114818	1.702	84.64
																			162	0.303	0.877	16.36	0.097379	1.539	81.99
																			163	0.31	14.937	17.184	0.167609	1.9	85.37
																			164	0.3	15.043	14.955	0.155512	1.856	88.15
																			165	0.298	1.443	15.275	0.149522	1.62	74.94
																			166	0.297	4.973	15.875	0.139117	1.431	83.39
																			167	0.287	12.337	16.531	0.12378	1.62	84.88
																			168	0.284	4.887	17.993	0.0958424	1.679	81.42
																			169	0.284	18.35	19.432	0.0995045	2.154	74.09
																			170	0.278	21.547	20.574	0.0799643	1.951	77.5
																			171	0.265	4.56	20.829	0.0768266	1.709	75.51
																			172	0.258	2.737	21.574	0.0688916	2.159	70.82
																			173	0.245	15.057	21.669	0.0988673	2.165	74.11
																			174	0.237	15.637	18.669	0.154187	1.45	88.46
																			175	0.231	0.137	20.008	0.144344	1.952	76.23
																			176	0.227	0.087	19.993	0.106689	2.734	70.48
																			177	0.225	20.3	20.659	0.0677819	2.218	75.83
																			178	0.242	11.053	19.375	0.104854	1.666	81.53
																			179	0.247	3.383	18.481	0.0786029	1.418	83.71
																			180	0.255	1.223	18.212	0.0916443	1.665	81.17
																			181	0.267	3.487	19.034	0.101572	2.139	66.22
																			182	0.27	3.383	17.962	0.10685	1.878	77.51
																			183	0.245	5.477	18.722	0.107549	1.616	80.1
																			184	0.232	1.027	19.942	0.152931	1.867	73.77
																			185	0.222	3.697	20.574	0.168402	2.137	70.19
																			186	0.208	4.293	21.54	0.110232	2.162	64.56
																			187	0.209	0	22.644	0.191148	1.914	56.72
																			188	0.212	0.36	23.035	0.201044	2.196	58.47
																			189	0.215	0.003	21.909	0.175809	2.105	58.89
																			190	0.223	0.187	22.241	0.118791	2.379	61.57
																			191	0.234	0.013	21.973	0.10403	2.665	60.51
																			192	0.226	0.483	23.356	0.0683949	3.112	57.8
																			193	0.223	1.153	23.355	0.0928029	2.861	60.99
																			194	0.221	0.093	24.291	0.153331	2.729	58.51
																			195	0.22	0	25.523	0.0874851	2.557	56.15
																			196	0.219	0.003	25.574	0.0425994	2.594	52.6
																			197	0.23	0.413	25.588	0.0657108	2.256	56.46
																			198	0.242	30.043	24.921	0.212621	2.759	65.36
																			199	0.25	28.61	20.495	0.156775	2.117	80.32
																			200	0.243	24.673	17.605	0.0963859	1.712	90.33
																			201	0.238	1.373	17.917	0.161584	1.652	78.84
																			202	0.233	0.657	18.255	0.172279	2.54	75.47
																			203	0.23	29.653	19.35	0.155336	2.193	79.37
																			204	0.22	2.383	17.962	0.192617	1.773	81.52
																			205	0.216	0.8	19.725	0.190944	2.18	74.36
																			206	0.216	0.267	20.908	0.166145	2.462	66.82
																			207	0.216	10.317	21.27	0.142849	2.514	68.41
																			208	0.292	3.567	18.659	0.14563	2.181	77.95
																			209	0.296	0.477	19.248	0.190175	2.031	68.95
																			210	0.301	4.463	21.646	0.183847	2.215	67.41
																			211	0.315	24.053	19.963	0.131287	2.068	78.68
																			212	0.263	0.4	19.244	0.125811	1.833	75.49
																			213	0.258	14.703	18.804	0.138015	1.755	82.42
																			214	0.261	4.06	18.248	0.137298	1.882	85.61
																			215	0.259	23.227	19.936	0.130311	2.205	78.25
																			216	0.25	1.007	18.98	0.124476	1.716	80.67
																			217	0.242	1.433	19.841	0.137988	1.968	76.71
																			218	0.236	3.15	19.92	0.160457	1.7	76.41
																			219	0.237	0.383	20.789	0.136784	2.185	73.35
																			220	0.237	1.003	21.08	0.14508	2.054	69.8
																			221	0.237	6.803	20.047	0.111799	1.981	74.13
																			222	0.235	0	21.148	0.0984097	2.012	64.55
																			223	0.237	0	22.483	0.148391	2.198	61.35
																			224	0.233	0.5	22.012	0.173778	2.324	65.51
																			225	0.232	0.127	22.379	0.183387	2.179	66.25
																			226	0.229	4.553	21.941	0.127192	2.081	66.22
																			227	0.234	0.66	21.109	0.11948	1.958	69.51
																			228	0.239	0.223	20.548	0.139882	2.182	67.1
																			229	0.24	1.717	21.343	0.134704	2.461	64.75
																			230	0.24	5.763	21.482	0.0588375	2.289	67.03
																			231	0.233	2.55	21.785	0.119051	1.945	70.64
																			232	0.266	1.68	21.196	0.153457	1.939	70.56
																			233	0.272	0.023	21.124	0.112921	2.148	64.99
																			234	0.277	1.76	21.965	0.180955	1.97	66.34
																			235	0.27	1.79	21.34	0.127345	1.975	68.44
																			236	0.246	15.227	20.748	0.100444	2.017	80.8
																			237	0.255	6.517	19.634	0.174495	2.075	75.47
																			238	0.297	0	21.287	0.170219	2.079	68.09
																			239	0.307	0	19.597	0.0548504	2.621	66.85
																			240	0.325	5.583	19.824	0.0416973	2.632	70.29
																			241	0.321	17.513	20.398	0.105688	2.524	70.29
																			242	0.317	10.03	18.629	0.16362	2.702	79.64
																			243	0.313	4.34	15.016	0.123774	2.34	84.04
																			244	0.314	0.75	13.991	0.162342	1.729	80.26
																			245	0.313	5.873	14.447	0.0722143	1.642	87.9
																			246	0.306	11.153	14.217	0.0863019	2.177	86.17
																			247	0.31	0	13.369	0.168909	1.776	77.04
																			248	0.322	0	15.195	0.168882	1.625	66.68
																			249	0.325	0	17.74	0.156679	1.512	64.52
																			250	0.30575	0.267	17.152	0.149726	1.474	71.3
																			251	0.2865	0.813	16.934	0.0940278	1.723	72.54
																			252	0.26725	5.43	15.196	0.115781	1.571	84.11
																			253	0.248	5.42	15.567	0.106252	1.483	82.33
																			254	0.252	5.69	16.775	0.0971227	1.83	75.51
																			255	0.256	0.733	16.957	0.118583	1.656	75.78
																			256	0.271	0	19.175	0.116356	1.885	72.11
																			257	0.264	48.743	18.618	0.0970124	2.097	77.64
																			258	0.266	1.6	17.482	0.10114	1.764	81.32
																			259	0.251	0.71	19.246	0.0698566	1.868	78.34
																			260	0.252	0.007	19.814	0.0910399	1.94	74.89
																			261	0.249	0.23	20.861	0.0969164	2.367	68.35
																			262	0.261	24.183	19.55	0.0391916	2.112	75.15
																			263	0.275	25.127	16.666	0.0979328	1.847	88.13
																			264	0.265	7.07	17.303	0.0905835	1.969	80.61
																			265	0.266	5.373	15.465	0.0985223	2.384	85.27
																			266	0.272	0.663	12.722	0.0817693	1.528	89.76
																			267	0.275	16.643	13.217	0.0849305	1.596	91.05
																			268	0.272	0.763	13.644	0.0871191	1.346	86.41
																			269	0.269	0.013	16.6	0.0826904	1.771	84.68
																			270	0.264	27.293	16.142	0.069063	2.305	82.46
																			271	0.257	1.43	13.31	0.0867805	1.604	83.7
																			272	0.243	0.13	16.361	0.0789736	1.772	78.59
																			273	0.236	0	17.857	0.0694201	2.171	75.05
[truncated: 105 more columns]
