# Supplementary material for: Scale-Dependent Transition in Soil Moisture Memory and Its Environmental Controls in Complex Mountain Terrain
Source: Copernicus journal article supplement (doi:10.5194/egusphere-2025-6014), 2026-01-06
Supplement: Supplementary file 3 [file S3 Soil Moisture and Its Drivers in the Jiangjia Ravine.xlsx]

## Sheet: Sheet1
date	SM	Prec.	T2m	AE	WS	rhu	NDVI	elevation_m	slope	aspect	twi	density (g/cm?)	sand_content_g/kg	silt_content_g/kg	clay_content_g/kg		Rainy season	date	SM	Prec.	T2m	AE	WS	rhu	NDVI	elevation_m	slope	aspect	twi	density (g/cm?)	sand_content_g/kg	silt_content_g/kg	clay_content_g/kg		The first month of the dry season	date	SM	Prec.	T2m	AE	WS	rhu	NDVI	elevation_m	slope	aspect	twi	density (g/cm?)	sand_content_g/kg
2022-05-01	0.216	0	1.26559	0.089511	3.117	80.6	0.585661	2565	16.4345	216.073	1.22088	1.27	377	349	273		May to Oct, 2022	2022-05-02	0.216	1	3.32695	0.0881458	3.117	80.6	0.585661										Nov, 2021	2022305	0.258	0	5.379	0.0389867	2.133	72.41
2022-05-02	0.214	1	3.32695	0.0881458	2.173	59.38												2022-05-03	0.214	1.6	4.41322	0.0854236	2.173	59.38												2022306	0.278	0	5.63623	0.0513377	2.903	64.32
2022-05-03	0.211	1.6	4.41322	0.0854236	2.215	52.66												2022-05-04	0.211	0.1	6.57165	0.0707536	2.215	52.66												2022307	0.284	0	5.41573	0.0509261	3.419	57.51
2022-05-04	0.205	0.1	6.57165	0.0707536	2.063	49.29												2022-05-05	0.205	1.4	6.43803	0.0663939	2.063	49.29												2022308	0.283	0	5.62694	0.0382822	3.691	51.08
2022-05-05	0.21	1.4	6.43803	0.0663939	2.686	62.07												2022-05-06	0.21	3.9	6.66439	0.0471876	2.686	62.07												2022309	0.282	0	5.34505	0.0261237	3.647	46.23
2022-05-06	0.225	3.9	6.66439	0.0471876	2.472	60.66												2022-05-07	0.225	6.4	7.52788	0.0294777	2.472	60.66												2022310	0.279	0	5.3632	0.0259912	2.907	49.29
2022-05-07	0.226	6.4	7.52788	0.0294777	3.404	56.32												2022-05-08	0.226	5.3	7.88358	0.0403851	3.404	56.32												2022311	0.28	0	0.859892	0.0263854	4.847	62.11
2022-05-08	0.245	5.3	7.88358	0.0403851	3.186	67.98												2022-05-09	0.245	14.9	7.08309	0.0573606	3.186	67.98												2022312	0.277	0	2.37839	0.0232622	2.923	60.68
2022-05-09	0.276	14.9	7.08309	0.0573606	3.47	67.56												2022-05-10	0.276	0	7.98505	0.0883923	3.47	67.56												2022313	0.28	0	2.22245	0.0277789	3.413	64.52
2022-05-10	0.297	0	7.98505	0.0883923	2.845	59.06												2022-05-11	0.297	38.9	7.10486	0.104591	2.845	59.06												2022314	0.278	0	3.26375	0.0359864	2.667	63.09
2022-05-11	0.309	38.9	7.10486	0.104591	3.863	70.26												2022-05-12	0.309	3.6	6.99638	0.0590104	3.863	70.26												2022315	0.282	0	3.28638	0.0341932	3.668	59.8
2022-05-12	0.323	3.6	6.99638	0.0590104	2.011	72.8												2022-05-13	0.323	0.1	6.87406	0.105641	2.011	72.8												2022316	0.284	0	0.987251	0.0372405	2.321	60.55
2022-05-13	0.32	0.1	6.87406	0.105641	3.573	74.26												2022-05-14	0.32	1.8	5.82498	0.115272	3.573	74.26												2022317	0.283	0	2.40619	0.0397854	1.853	67.23
2022-05-14	0.312	1.8	5.82498	0.115272	3.576	78.14												2022-05-15	0.312	0	3.24732	0.116513	3.576	78.14												2022318	0.277	0	4.07702	0.0369998	2.025	72.15
2022-05-15	0.303	0	3.24732	0.116513	2.254	90.92												2022-05-16	0.303	22.3	4.98724	0.129958	2.254	90.92												2022319	0.273	0	4.57954	0.0340559	2.945	61.5
2022-05-16	0.297	22.3	4.98724	0.129958	1.985	76.79												2022-05-17	0.297	0	5.66801	0.128229	1.985	76.79												2022320	0.265	0.8	3.80797	0.0322013	2.577	71.36
2022-05-17	0.289	0	5.66801	0.128229	3.259	85.61												2022-05-18	0.289	0	7.46366	0.0836692	3.259	85.61												2022321	0.255	0	2.22228	0.0356357	2.176	68.31
2022-05-18	0.288	0	7.46366	0.0836692	3.225	73.68												2022-05-19	0.288	0	6.84293	0.100481	3.225	73.68												2022322	0.255	0	4.32354	0.0273821	2.502	59.11
2022-05-19	0.294	0	6.84293	0.100481	3.428	72.59												2022-05-20	0.294	0.4	6.20077	0.101371	3.428	72.59												2022323	0.261	0	4.65262	0.0263888	2.253	53.59
2022-05-20	0.296	0.4	6.20077	0.101371	2.153	73.41												2022-05-21	0.296	98.8	6.12847	0.0928179	2.153	73.41												2022324	0.259	0	4.57634	0.024054	2.663	63.44
2022-05-21	0.293	98.8	6.12847	0.0928179	2.039	95.16												2022-05-22	0.293	38.8	5.5699	0.0912608	2.039	95.16												2022325	0.265	0	1.76847	0.0214152	3.585	75.66
2022-05-22	0.296	38.8	5.5699	0.0912608	2.012	96.86												2022-05-23	0.296	0	6.75901	0.09771	2.012	96.86												2022326	0.265	0	0.407727	0.0154587	2.173	85.83
2022-05-23	0.301	0	6.75901	0.09771	1.838	86.58												2022-05-24	0.301	0	7.6696	0.107036	1.838	86.58												2022327	0.262	0	0.728909	0.018577	1.799	88.06
2022-05-24	0.3	0	7.6696	0.107036	2.766	80.75												2022-05-25	0.3	0	9.10725	0.0774063	2.766	80.75												2022328	0.255	0	1.90871	0.0269166	1.872	82.8
2022-05-25	0.304	0	9.10725	0.0774063	3.21	62.08												2022-05-26	0.304	99.3	7.59458	0.0929432	3.21	62.08												2022329	0.252	0	2.948	0.0290377	1.75	73.65
2022-05-26	0.311	99.3	7.59458	0.0929432	2.641	85.4												2022-05-27	0.311	0.2	8.03202	0.0950358	2.641	85.4												2022330	0.242	0.9	2.86142	0.0230112	2.294	74.44
2022-05-27	0.312	0.2	8.03202	0.0950358	2.232	85.99												2022-05-28	0.312	0	8.88879	0.0931929	2.232	85.99												2022331	0.243	1.6	2.99227	0.0175845	1.916	88.25
2022-05-28	0.307	0	8.88879	0.0931929	2.585	70.56												2022-05-29	0.307	0	8.64645	0.0747612	2.585	70.56												2022332	0.245	0.8	3.41914	0.0169353	2.209	75.51
2022-05-29	0.296	0	8.64645	0.0747612	4.04	62.48												2022-05-30	0.296	0	7.32289	0.0997503	4.04	62.48												2022333	0.24	0	2.21928	0.0208402	3.871	68.95
2022-05-30	0.291	0	7.32289	0.0997503	2.829	66.46												2022-05-31	0.291	3.7	8.12565	0.104994	2.829	66.46												2022334	0.241	0	1.24678	0.0153853	1.976	56.94
2022-05-31	0.29	3.7	8.12565	0.104994	4.316	69.32												2022-06-01	0.29	0.2	8.75939	0.0963114	4.316	69.32	0.739976
																		2022-06-02	0.29	0	9.25638	0.08191	3.211	69.47
																		2022-06-03	0.299	0	8.68565	0.090124	3.229	64.25
																		2022-06-04	0.311	2.9	8.72945	0.146669	1.972	72.67
																		2022-06-05	0.314	36.4	6.62899	0.144713	2.521	74.23
																		2022-06-06	0.319	0	7.1294	0.1294	2.468	86.33
																		2022-06-07	0.323	0.9	7.58604	0.0970572	2.485	67.84
																		2022-06-08	0.332	1.1	7.31799	0.107894	1.934	68.98
																		2022-06-09	0.336	61	6.87965	0.0903689	1.806	88.78
																		2022-06-10	0.343	8.1	6.7464	0.114818	2.33	89.84
																		2022-06-11	0.351	0.6	7.48457	0.097379	2.113	89.14
																		2022-06-12	0.35	15.1	7.70441	0.167609	1.746	90.3
																		2022-06-13	0.341	13.6	5.7044	0.155512	2.797	85.95
																		2022-06-14	0.336	0	5.89832	0.149522	1.984	91.08
																		2022-06-15	0.33	3.4	6.73945	0.139117	1.884	76.5
																		2022-06-16	0.303	2.6	7.57116	0.12378	1.904	78.18
																		2022-06-17	0.287	0	8.51214	0.0958424	2.12	88.26
																		2022-06-18	0.268	0	9.08136	0.0995045	2.591	72.95
																		2022-06-19	0.252	1	8.92844	0.0799643	2.627	65.72
																		2022-06-20	0.233	0	9.12006	0.0768266	2.211	74.59
																		2022-06-21	0.222	0	9.61362	0.0688916	2.461	69.8
																		2022-06-22	0.206	1	9.23451	0.0988673	3.097	64.75
																		2022-06-23	0.186	6.6	8.20628	0.154187	4.286	67.45
																		2022-06-24	0.214	1.7	7.73577	0.144344	2.385	83.89
																		2022-06-25	0.244	0.1	8.64593	0.106689	2.507	84.23
																		2022-06-26	0.278	0	8.89851	0.0677819	4.143	68.51
																		2022-06-27	0.297	10.3	7.74117	0.104854	4.77	68.22
																		2022-06-28	0.314	9	7.57099	0.0786029	2.036	88.33
																		2022-06-29	0.285	0	8.15599	0.0916443	2.459	73.02
																		2022-06-30	0.256	0	8.58342	0.101572	1.859	80.2
																		2022-07-01	0.226	36.7	7.98989	0.10685	2.433	65.14	0.904698
																		2022-07-02	0.234	4	8.05494	0.107549	2.041	84.91
																		2022-07-03	0.244	0.6	8.2733	0.152931	2.272	83.26
																		2022-07-04	0.248	1.3	8.37187	0.168402	1.816	79.83
																		2022-07-05	0.257	11.1	8.26543	0.110232	2.159	79.33
																		2022-07-06	0.271	0	9.35419	0.191148	2.524	77.66
																		2022-07-07	0.273	0	9.50066	0.201044	2.182	59.19
																		2022-07-08	0.279	0	9.30776	0.175809	2.834	58.55
																		2022-07-09	0.285	4.2	8.6869	0.118791	2.634	59.25
																		2022-07-10	0.283	0	9.25042	0.10403	2.816	71.61
																		2022-07-11	0.284	0	9.74197	0.0683949	4.189	63.8
																		2022-07-12	0.282	0	10.0334	0.0928029	4.126	62.39
																		2022-07-13	0.276	0	10.2485	0.153331	4.1	58.5
																		2022-07-14	0.269	0.4	10.0446	0.0874851	3.642	57.1
																		2022-07-15	0.269	0	10.4187	0.0425994	3.389	60.55
																		2022-07-16	0.269	0	10.7567	0.0657108	3.142	53.72
																		2022-07-17	0.27	0	10.0085	0.212621	3.018	57.1
																		2022-07-18	0.267	12.7	8.88872	0.156775	3.247	60.68
																		2022-07-19	0.266	16	7.71591	0.0963859	2.464	80.9
																		2022-07-20	0.261	28.2	6.99259	0.161584	2.171	94.54
																		2022-07-21	0.26	0.2	8.29695	0.172279	1.606	92.4
																		2022-07-22	0.256	0	8.80704	0.155336	2.878	80.97
																		2022-07-23	0.257	0.3	8.46495	0.192617	3.256	70.04
																		2022-07-24	0.264	0	8.70034	0.190944	2.684	75.4
																		2022-07-25	0.274	0	9.23062	0.166145	2.36	70.6
																		2022-07-26	0.273	0	9.36882	0.142849	2.944	63.48
																		2022-07-27	0.272	16.3	8.43662	0.14563	3.268	62.75
																		2022-07-28	0.272	0	7.92903	0.190175	2.132	78.4
																		2022-07-29	0.272	0	9.50187	0.183847	2.815	74.81
																		2022-07-30	0.259	8.7	8.68673	0.131287	2.009	63.2
																		2022-07-31	0.26	0.6	7.82387	0.125811	2.681	71.31
																		2022-08-01	0.26	0.2	8.20453	0.138015	1.999	81.97	0.908532
																		2022-08-02	0.265	0.1	8.09868	0.137298	2.698	79.31
																		2022-08-03	0.262	1.6	8.93691	0.130311	2.947	81.94
																		2022-08-04	0.265	9.4	8.13873	0.124476	2.564	74
																		2022-08-05	0.264	14.3	8.2123	0.137988	2.229	78.94
																		2022-08-06	0.261	6.3	8.29952	0.160457	2.263	80.38
																		2022-08-07	0.253	0	8.27696	0.136784	1.969	86.27
																		2022-08-08	0.249	0.9	8.68785	0.14508	2.628	73.65
																		2022-08-09	0.248	7.4	8.63842	0.111799	2.529	67.34
																		2022-08-10	0.25	0	9.22377	0.0984097	2.18	73.92
																		2022-08-11	0.256	0	8.9953	0.148391	2.053	65.42
																		2022-08-12	0.259	0	8.89528	0.173778	2.727	62.38
																		2022-08-13	0.259	0	9.2518	0.183387	2.964	64.46
																		2022-08-14	0.259	10	9.29448	0.127192	3.121	66.29
																		2022-08-15	0.26	10.5	9.17618	0.11948	2.515	66.75
																		2022-08-16	0.251	3.5	9.26935	0.139882	2.502	73.49
																		2022-08-17	0.246	0.7	9.05323	0.134704	2.203	75.53
																		2022-08-18	0.248	0	9.14848	0.0588375	2.399	71.41
																		2022-08-19	0.246	2.7	9.58401	0.119051	3.09	67.28
																		2022-08-20	0.234	1.5	9.31197	0.153457	2.044	66.26
																		2022-08-21	0.232	0	8.73459	0.112921	2.369	66.44
																		2022-08-22	0.217	0	9.51399	0.180955	2.988	65.51
																		2022-08-23	0.209	2.6	9.55987	0.127345	2.801	65.9
																		2022-08-24	0.2	17.9	9.00344	0.100444	2.116	72.11
																		2022-08-25	0.199	0.9	8.77243	0.174495	2.722	72.73
																		2022-08-26	0.202	0	8.04667	0.170219	2.166	79.05
																		2022-08-27	0.232	0	8.37484	0.0548504	2.973	72.41
																		2022-08-28	0.264	0	9.04533	0.0416973	3.546	69.01
																		2022-08-29	0.286	0	9.0454	0.105688	3.939	67.53
																		2022-08-30	0.306	6.2	8.47394	0.16362	4.096	66.75
																		2022-08-31	0.336	0	6.43322	0.123774	3.777	70.07
																		2022-09-01	0.368	0	6.65151	0.162342	3.09	75.1	0.857655
																		2022-09-02	0.367	1.8	7.4025	0.0722143	2.13	72.75
																		2022-09-03	0.375	5.8	6.18845	0.0863019	2.3	85.4
																		2022-09-04	0.364	0	5.85508	0.168909	3.193	86.16
																		2022-09-05	0.338	0	6.87504	0.168882	1.906	69.8
																		2022-09-06	0.299	0	7.58239	0.156679	2.009	55.99
																		2022-09-07	0.295	0.3	7.38679	0.149726	1.627	51.67
																		2022-09-08	0.294	0	7.56404	0.0940278	1.985	57.97
																		2022-09-09	0.308	33.2	6.73803	0.115781	2.146	62.93
																		2022-09-10	0.312	10.1	6.06751	0.106252	2.216	79.76
																		2022-09-11	0.313	21.1	6.24052	0.0971227	1.416	93.45
																		2022-09-12	0.303	0.6	6.61515	0.118583	1.892	88.17
																		2022-09-13	0.294	0	7.76185	0.116356	1.698	88.82
																		2022-09-14	0.287	13.3	8.14709	0.0970124	2.451	72.58
																		2022-09-15	0.29	54.6	6.98057	0.10114	3.067	69.95
																		2022-09-16	0.295	0	7.95521	0.0698566	1.573	91.25
																		2022-09-17	0.293	0	8.32952	0.0910399	2.096	79.98
																		2022-09-18	0.305	0	9.14054	0.0969164	2.739	72.82
																		2022-09-19	0.327	0.2	8.65785	0.0391916	2.691	65.92
																		2022-09-20	0.339	11.2	7.64944	0.0979328	2.321	70.84
																		2022-09-21	0.356	0.6	7.34509	0.0905835	2.391	86.57
																		2022-09-22	0.376	0	6.45473	0.0985223	1.98	85.12
																		2022-09-23	0.364	0.1	6.03388	0.0817693	3.012	87.86
																		2022-09-24	0.346	0	6.51974	0.0849305	2.085	88.18
																		2022-09-25	0.338	0	6.85973	0.0871191	2.22	87.9
																		2022-09-26	0.325	0	7.64121	0.0826904	2.335	82.54
																		2022-09-27	0.307	0	7.45816	0.069063	3.117	72.5
																		2022-09-28	0.308	0.4	6.04343	0.0867805	3.237	76.11
																		2022-09-29	0.292	0	6.84221	0.0789736	2.309	81.98
																		2022-09-30	0.285	0	7.28018	0.0694201	2.469	74.82
																		2022-10-01	0.278	0	8.02816	0.0382482	2.15	73.85	0.829486
																		2022-10-02	0.274	0	8.0306	0.0742007	2.753	72.42
																		2022-10-03	0.268	0.2	7.91665	0.0910918	3.791	72.06
																		2022-10-04	0.281	0	7.92106	0.0843898	4.219	71.89
																		2022-10-05	0.272	0	7.88519	0.028104	3.499	72.27
																		2022-10-06	0.268	0	6.61061	0.0506924	4.385	65.82
																		2022-10-07	0.267	0	6.40529	0.0556724	4.287	67.25
																		2022-10-08	0.264	0	6.32025	0.043864	2.596	80.03
																		2022-10-09	0.263	0.4	2.59511	0.0604538	3.41	76.17
																		2022-10-10	0.286	0	3.26938	0.068461	2.769	87.71
																		2022-10-11	0.312	0	4.56785	0.0731195	1.783	83.38
																		2022-10-12	0.336	0	5.16265	0.0631526	1.526	87.75
																		2022-10-13	0.336	0	4.96356	0.0296832	2.347	89.33
																		2022-10-14	0.322	0	4.35426	0.0717287	2.298	87.25
																		2022-10-15	0.297	0	4.48228	0.0701661	2.118	83.71
																		2022-10-16	0.28	0	3.99922	0.0673356	2.507	74.29
																		2022-10-17	0.256	0	3.78567	0.0576192	2.924	63.82
																		2022-10-18	0.25	0.4	4.0949	0.0589921	2.582	57.86
																		2022-10-19	0.249	0	4.98019	0.0513211	1.745	62.05
																		2022-10-20	0.263	0	6.03155	0.0498552	1.898	54.85
																		2022-10-21	0.252	0.2	6.68079	0.0604168	3.09	56.1
																		2022-10-22	0.251	0	6.89089	0.0550322	1.719	68.92
																		2022-10-23	0.256	0.9	6.1293	0.0570104	2.407	72.09
																		2022-10-24	0.257	0.2	6.38481	0.0528326	1.938	86.13
																		2022-10-25	0.243	0	7.07242	0.0257349	2.071	85.36
																		2022-10-26	0.243	0.2	6.3939	0.0348753	3.753	72.6
																		2022-10-27	0.235	0.1	6.52178	0.0293864	2.188	80.22
																		2022-10-28	0.218	0	6.62405	0.0248511	1.831	77.6
																		2022-10-29	0.217	1.2	6.28831	0.0238925	2.265	72.13
																		2022-10-30	0.224	0	4.96149	0.0529521	2.557	73.03
																		2022-10-31	0.24	0	4.12586	0.0538438	2.36	68.98
[truncated: 104 more columns]
